# Supplementary material
Source: Springer Nature journal article supplement (https://www.springermedizin.de/resource/supplementary/12889_2013_5741_MOESM1_ESM.pdf/9496112)
Supplement: MOESM1 [file 9496112]

Clinic-level intervention and study referral

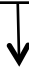

Eligibility screening and consent

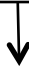

Pre-intervention data collected

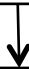

Randomization

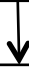

Home visit study orientation

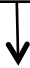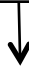

Smoking Behavioral  
Counseling Intervention

Nutrition Attention  
Control Intervention

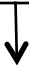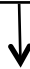

3-month (end-of-treatment) data collected

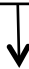

12-month follow-up data collected
